# Supplementary material for: Metamorphism during temperature gradient with undersaturated advective airflow in a snow sample
Source: Copernicus journal article supplement (doi:10.5194/tc-10-791-2016), 2016-04-07

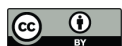

## *Supplement of*

# **Metamorphism during temperature gradient with undersaturated advective airflow in a snow sample**

**Pirmin Philipp Ebner et al.**

*Correspondence to:* Martin Schneebeli (schneebeli@slf.ch)

The copyright of individual parts of the supplement might differ from the CC-BY 3.0 licence.

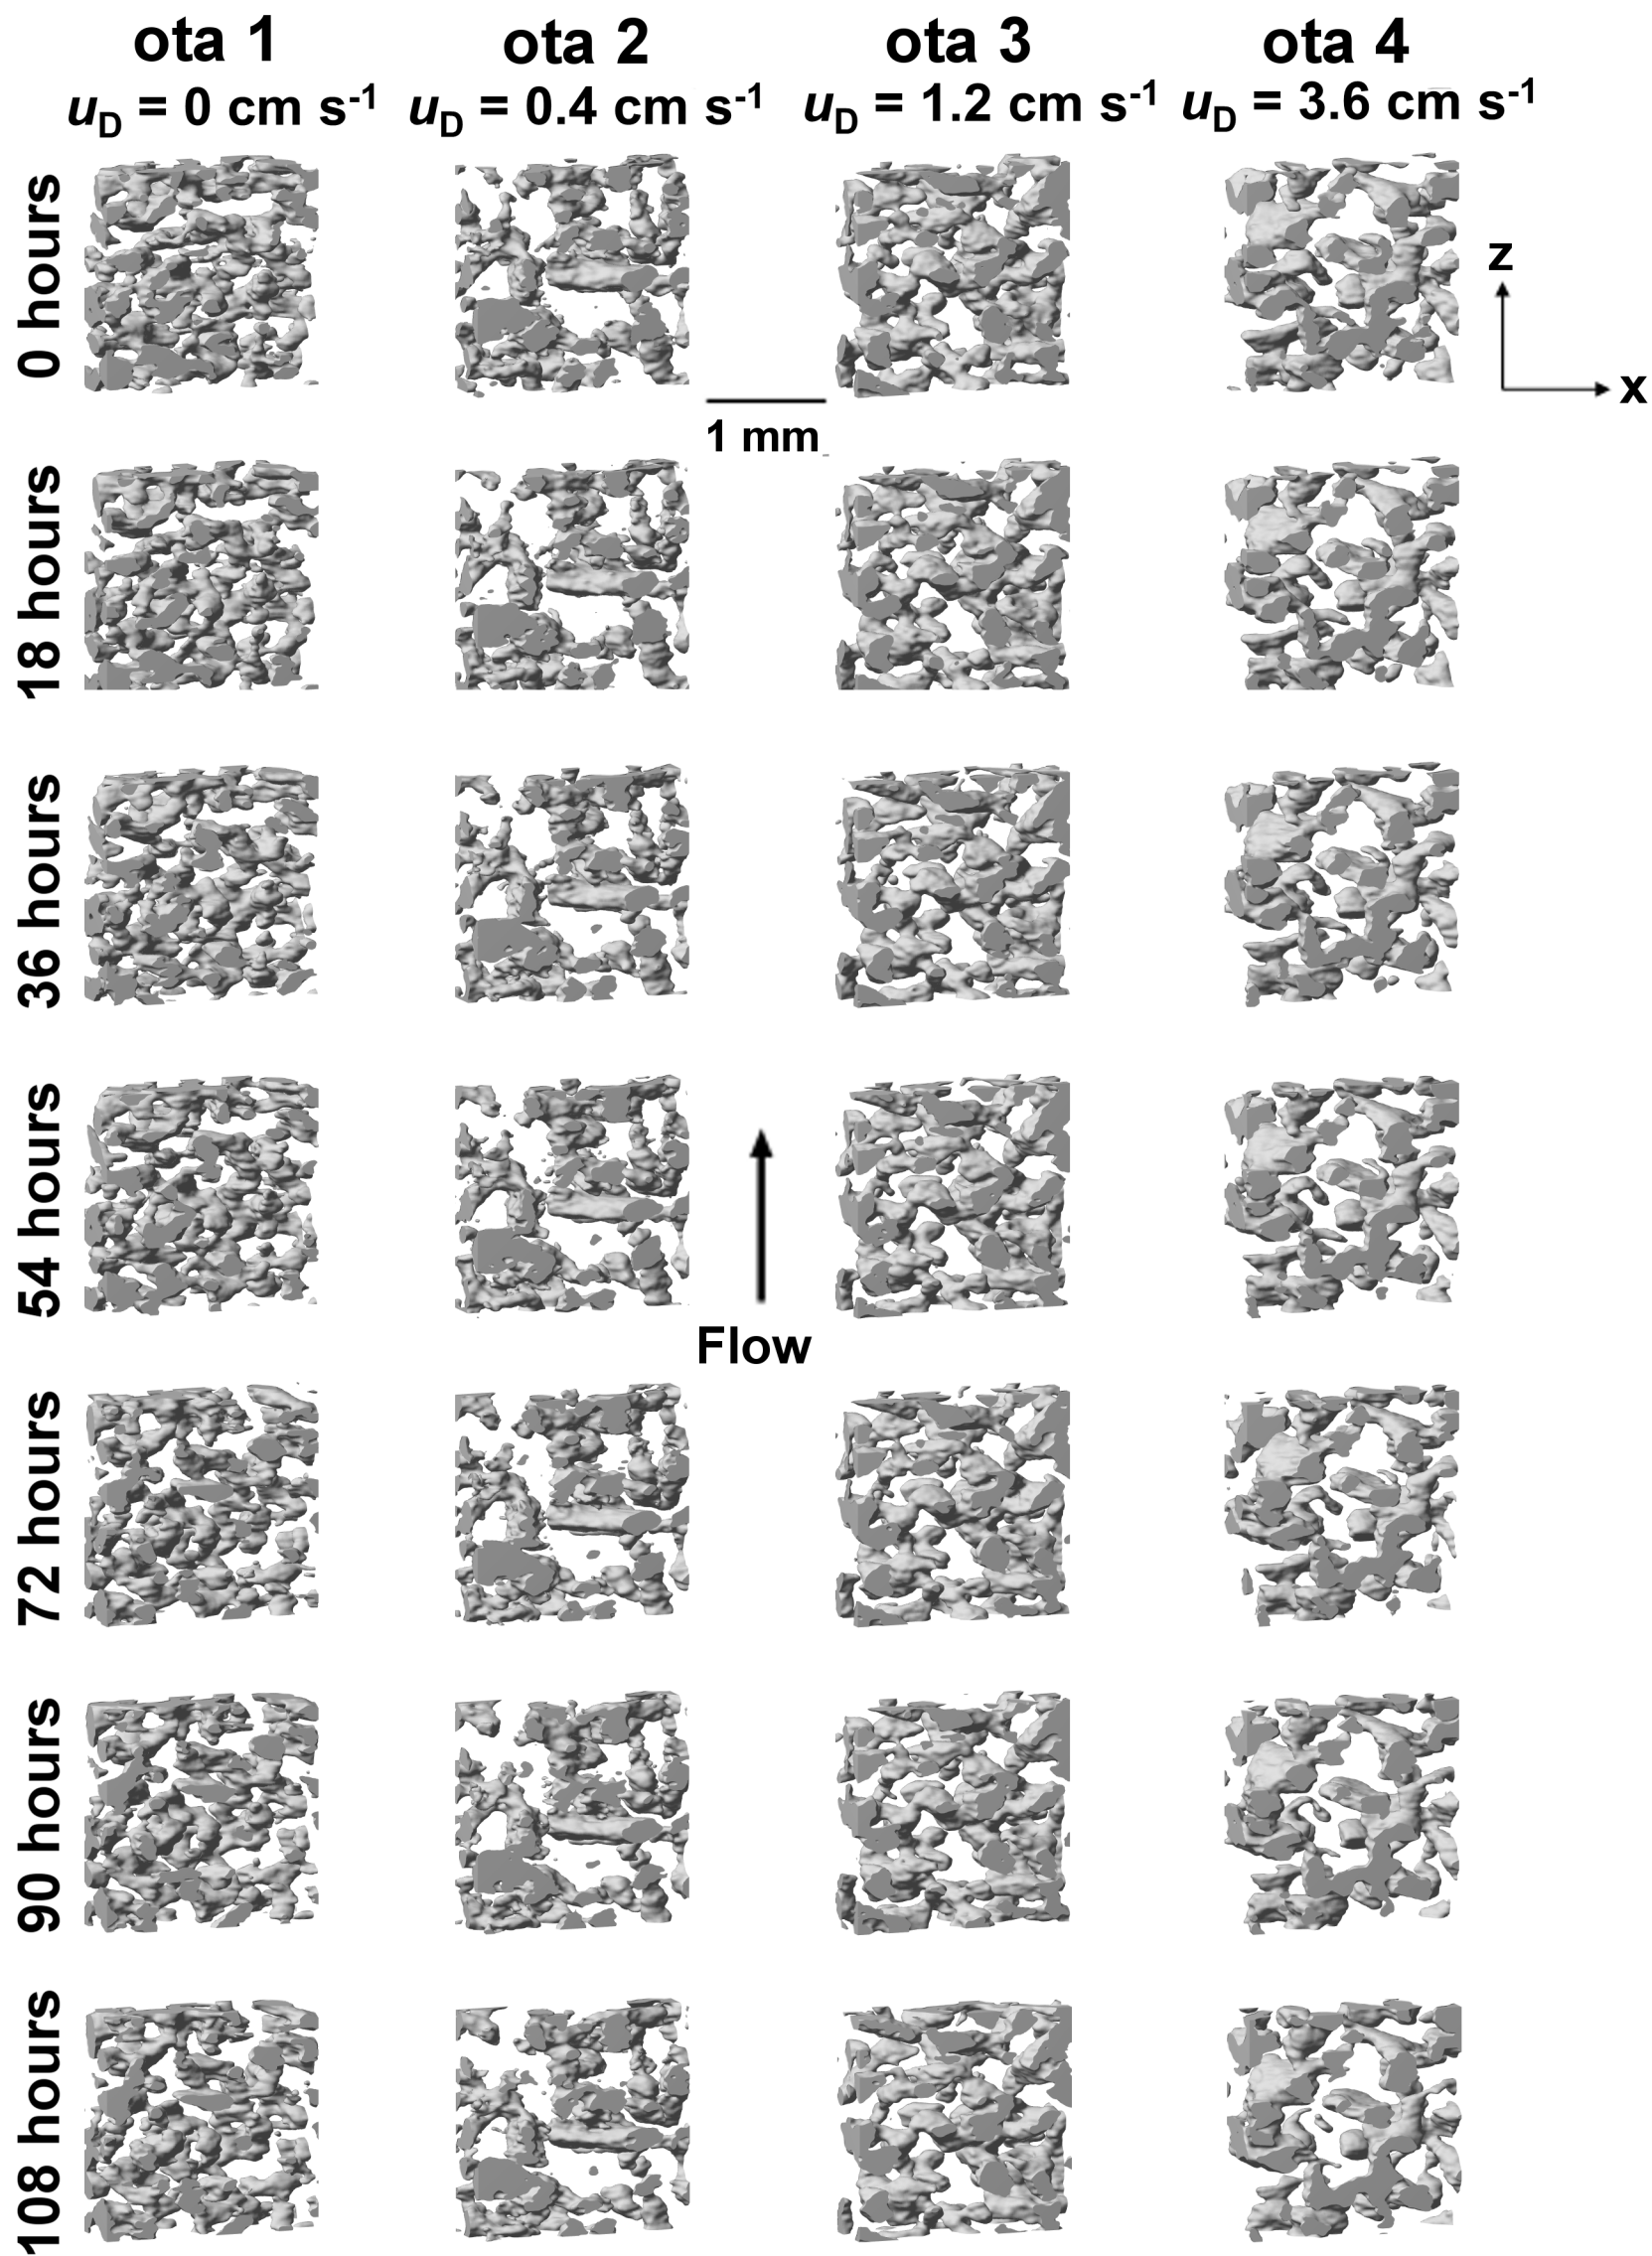

Supplement: Supplementary file 1 [file tc-10-791-2016-supplement.pdf]
